# Supplementary material for: Haemoplasma Prevalence and Diversity in Three Invasive Rattus Species from Gauteng Province, South Africa
Source: MDPI journal article supplement (doi:10.3390/microorganisms10081632), 2022-08-12
Supplement: s1 [file s1]

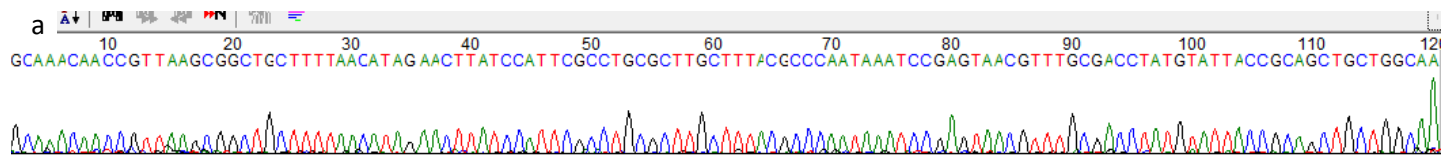

b [Download](#) [GenBank](#) [Graphics](#) [Next](#) [Previous](#) [Descriptions](#)

**Uncultured Mycoplasma sp. clone 20180131LOC1.16 16S ribosomal RNA gene, partial sequence**

Sequence ID: [MK295631.1](#) Length: 1175 Number of Matches: 1

Range 1: 321 to 439 [GenBank](#) [Graphics](#) [Next Match](#) [Previous Match](#)

| Score        | Expect                                              | Identities                                 | Gaps      | Strand     |
|--------------|-----------------------------------------------------|--------------------------------------------|-----------|------------|
| 182 bits(98) | 1e-41                                               | 112/119(94%)                               | 0/119(0%) | Plus/Minus |
| Query 2      | TGCAAACAACCGT                                       | TAAAGCGGCTGCTTTTAAACATAGAACTTATCCATTGCGCT  |           |            |
| Sbjct 439    | TGCAAACAACCGT                                       | TGAGCAGCTGCTTTTAAACAAGAAGAACTTATCCATCCGCCT |           |            |
| Query 62     | TTTACGCCCAATAAATCCGAGTAACGTTTGCACCTATGTATTACCGCAGCT |                                            |           |            |
| Sbjct 379    | TTTACGCCCAATAAATCCGAATAACGCTTGCACCTATGTATTACCGCAGCT |                                            |           |            |

**Figure S1.** (a) Trimmed 120 nt fragment of the chromatogram generated when screening ectoparasite sampled using the primer set MyClost-F/Mycop-R. The colour lines denote the four nucleotide bases: adenine (A) is indicated in green, cytosine (C) is indicated in blue, guanine (G) is indicated in black and thymine (T) is indicated in red. (b) Alignment result to MK295631 produced when performing a nucleotide blast (BlastN) search for the 120 nt 16S rRNA gene fragment generated when screening a *Haemaphysalis elliptica* tick for haemoplasma prevalence using the MyClost-F/Mycop-R primer set.
